# Supplementary material for: First dose mRNA vaccination is sufficient to reactivate immunological memory to SARS-CoV-2 in ex COVID-19 subjects
Source: bioRxiv or medRxiv preprint supplement (doi:10.1101/2021.03.05.21252590), 2021-03-08
Supplement: Supplementary file [file media-1.pdf]

**Supplementary Table S1. Demographic and clinical features of enrolled subjects.**

| Case ID             | Gender | Age at first dose vaccination | COVID-19 | Time from COVID-19 resolution to first dose vaccination (months) |
|---------------------|--------|-------------------------------|----------|------------------------------------------------------------------|
| <b>Ex-COVID-19</b>  |        |                               |          |                                                                  |
| EC1                 | F      | 51                            | severe   | 7                                                                |
| EC2                 | F      | 52                            | mild     | 7                                                                |
| EC3                 | M      | 60                            | severe   | 8.5                                                              |
| EC4                 | M      | 65                            | moderate | 9                                                                |
| EC5                 | F      | 53                            | moderate | 8                                                                |
| EC6                 | M      | 37                            | moderate | 8.5                                                              |
| EC7                 | F      | 54                            | mild     | 8                                                                |
| EC8                 | M      | 61                            | critical | 9                                                                |
| EC9                 | M      | 64                            | critical | 9                                                                |
| EC10                | F      | 51                            | mild     | 6                                                                |
| EC11                | F      | 44                            | moderate | 8                                                                |
| <b>Mean (years)</b> |        |                               |          |                                                                  |
|                     | -      | 53,8                          | -        | -                                                                |
| <b>SD (± years)</b> |        |                               |          |                                                                  |
|                     | -      | 8,5                           | -        | -                                                                |
| <b>Non-COVID-19</b> |        |                               |          |                                                                  |
| NC1                 | F      | 35                            | no       | na                                                               |
| NC2                 | F      | 61                            | no       | na                                                               |
| NC3                 | F      | 44                            | no       | na                                                               |
| NC4                 | F      | 41                            | no       | na                                                               |
| NC5                 | M      | 41                            | no       | na                                                               |
| NC6                 | M      | 32                            | no       | na                                                               |
| NC7                 | F      | 37                            | no       | na                                                               |
| NC8                 | F      | 29                            | no       | na                                                               |
| NC9                 | F      | 46                            | no       | na                                                               |
| NC10                | F      | 24                            | no       | na                                                               |
| NC11                | M      | 53                            | no       | na                                                               |
| <b>Mean (years)</b> |        |                               |          |                                                                  |
|                     | -      | 40,3                          | -        | -                                                                |
| <b>SD (± years)</b> |        |                               |          |                                                                  |
|                     | -      | 10,7                          | -        | -                                                                |

*na denotes not applicable*

**Supplementary Table S2. List of all fluorochrome mAbs used for flow cytometric analysis of antigen specific T cells.**

| <b>Antigen</b> | <b>Fluorochrome</b>         | <b>Clone</b> | <b>Company</b> |
|----------------|-----------------------------|--------------|----------------|
| TNF- $\alpha$  | FITC                        | 6401.1111    | BDBioscience   |
| CD154          | PE                          | TRAP1        | BDBioscience   |
| CD3            | PerCP                       | SK7          | BDBioscience   |
| CD4            | PE-Cy7                      | SK3          | Invitrogen     |
| CD8            | Super Bright 600            | SK1          | eBioscience™   |
| IL-2           | APC                         | MQ1-17H12    | BDBioscience   |
| IFN- $\gamma$  | Pacific Blue                | B27          | BioLegend      |
| L/D            | Fixable Viability Stain 780 |              | BDBioscience   |

**Supplementary Table S3. List of all fluorochrome mAbs used for flow cytometric analysis of immune checkpoint expression by antigen specific T cells.**

| <b>Antigen</b> | <b>Fluorochrome</b>         | <b>Clone</b> | <b>Company</b> |
|----------------|-----------------------------|--------------|----------------|
| TNF- $\alpha$  | FITC                        | MAb11        | BDBioscience   |
| IFN- $\gamma$  | FITC                        | 25723.11     | BDBioscience   |
| IL-2           | FITC                        | 5344.111     | BDBioscience   |
| CD8            | PerCP                       | SK1          | BDBioscience   |
| CD4            | eFluor506                   | RTA-T4       | Invitrogen     |
| CD3            | Pacific Blue                | UCHT1        | BDBioscience   |
| PD1 (CD279)    | PE-Cy7                      | EH12.2H7     | BioLegend      |
| TIGIT          | APC                         | MBSA43       | Invitrogen     |
| CD154          | PE                          | TRAP1        | BDBioscience   |
| L/D            | Fixable Viability Stain 780 |              | BDBioscience   |

**Supplementary Table S4. List of all fluorochrome mAbs used for flow cytometric analysis of antigen specific B cells.**

| <b>Antigen</b> | <b>Fluorochrome</b> | <b>Clone</b> | <b>Company</b> |
|----------------|---------------------|--------------|----------------|
| CD19           | APC-Vio770          | LT19         | Miltenyi       |
| CD27           | VioBright FITC      | M-T271       | Miltenyi       |
| IgA            | VioGreen            | IS11-8E10    | Miltenyi       |
| IgG            | VioBlue             | IS11-3B2.2.3 | Miltenyi       |
| CD14           | PerCP               | TÜK4         | Miltenyi       |
| IgM            | APC                 | PJ2-22H3     | Miltenyi       |
| CD3            | PerCP               | BW264/56     | Miltenyi       |
| 7AAD           |                     |              | Miltenyi       |
| Spike          | PE                  |              | Miltenyi       |
| Spike          | PE-Vio770           |              | Miltenyi       |

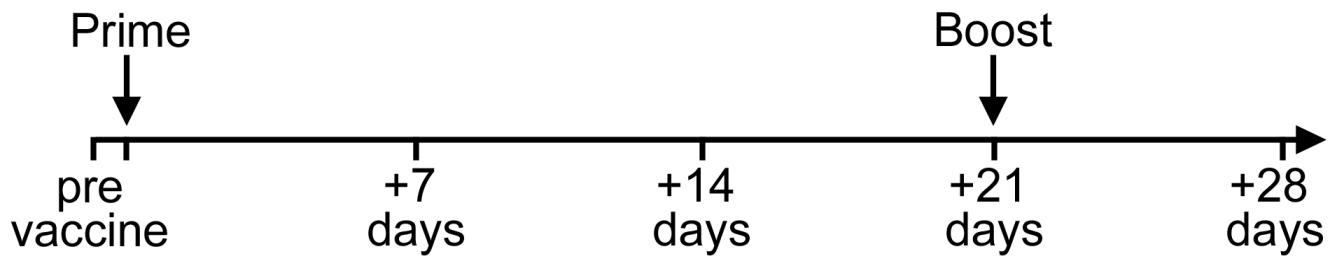

**Supplementary Figure S1. Vaccination schedule and time points of analysis**

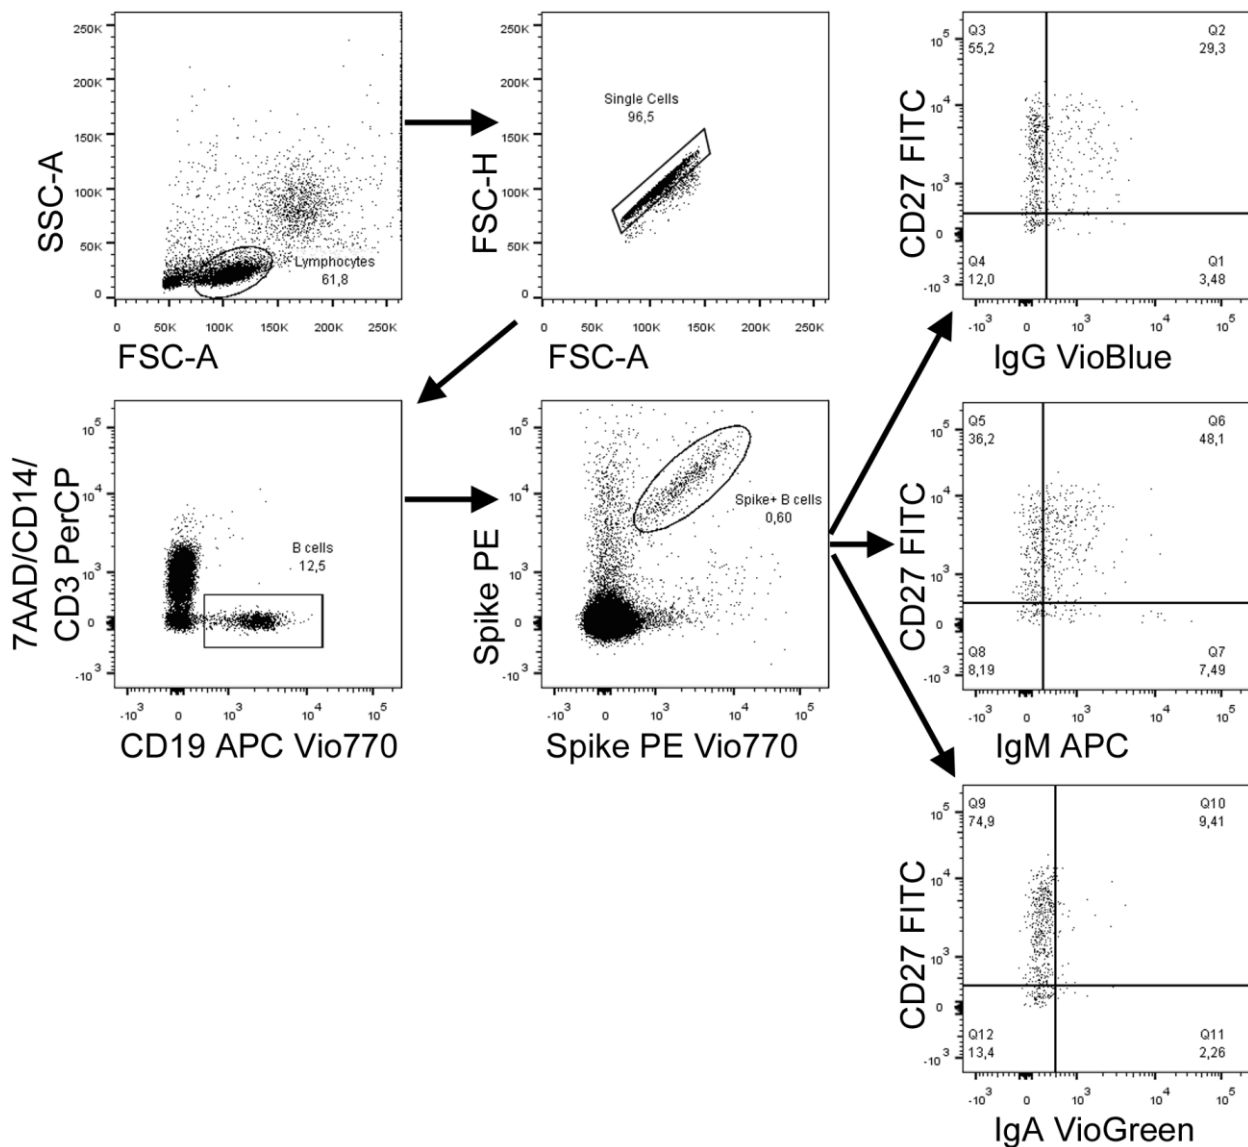

**Supplementary Figure 2: Gating strategy for the identification of spike-specific B cells**

Lymphocytes were gated based on physical parameters (FSC-SSC), then doublets were removed using FSC-A and FSC-A parameters. PerCP was used as dump channel for the exclusion of dead cells (7AAD), CD3+ T cells and CD14 monocytes. B cells were identified as CD19+. B cells binding PE- and PE Vio770-conjugated spike protein were then identified as spike-specific. Among spike-specific B cells we evaluated CD27 expression associated to IgG, IgM and IgA.

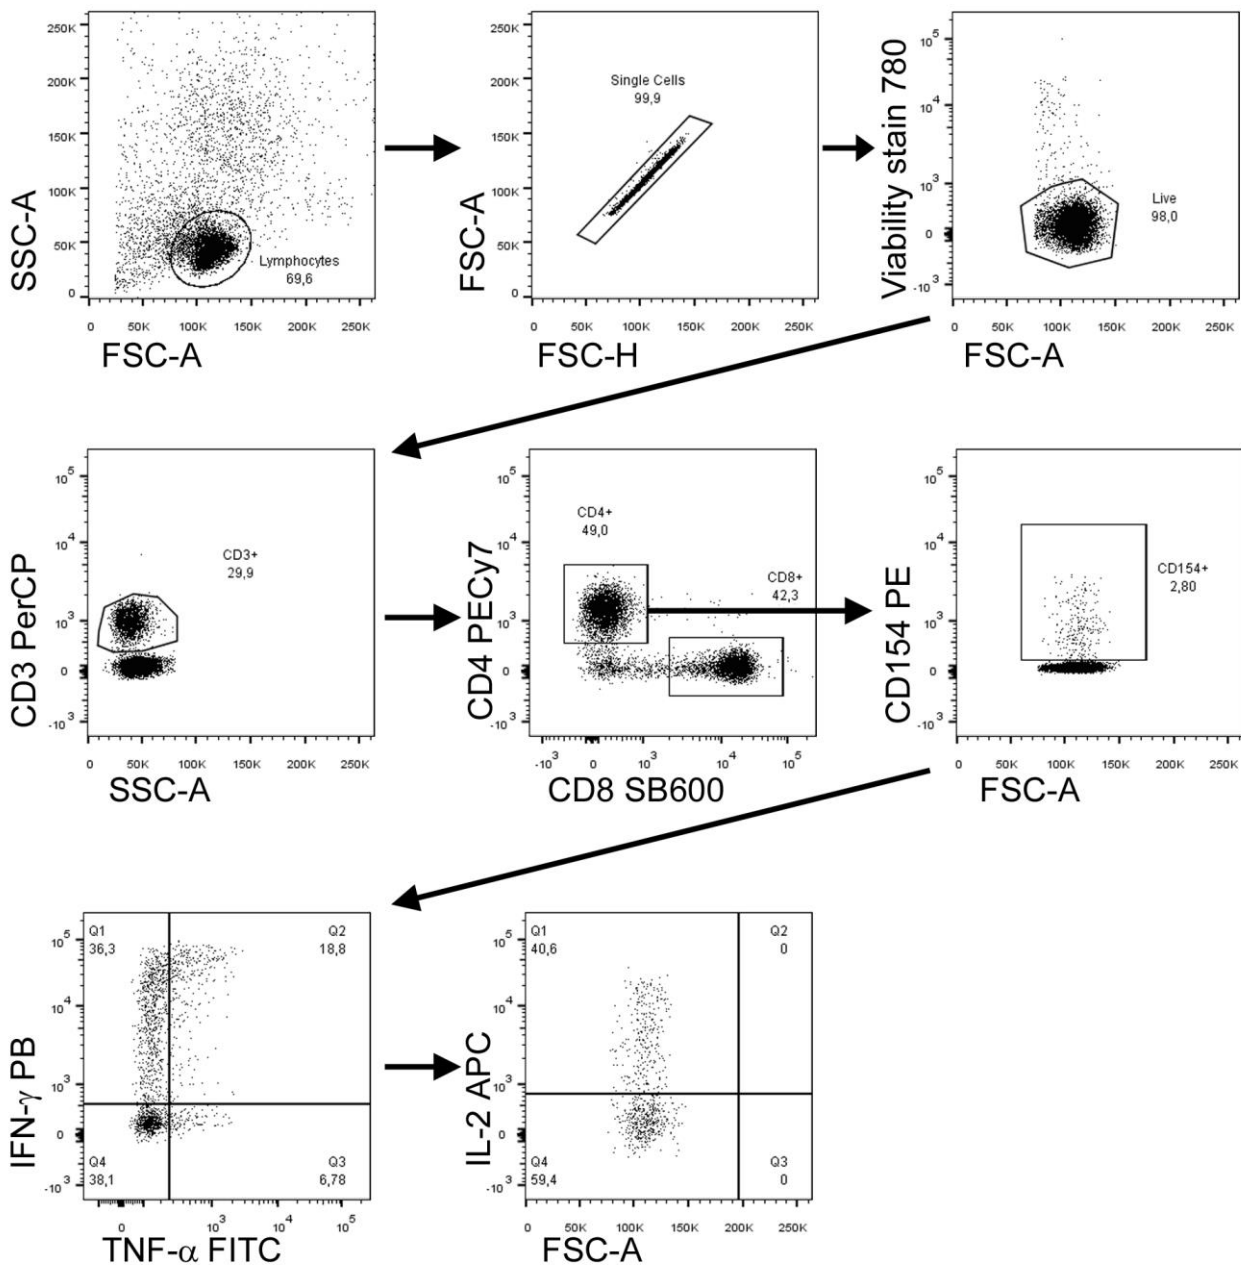

**Supplementary Figure 3: Gating strategy for the identification of spike-specific T cells**

Lymphocytes were gated based on physical parameters (FSC-SSC), then doublets were removed using FSC-A and FSC-H parameters. Dead cells were excluded using viability stain 780. T cells were identified as CD3+. We then identified CD4+ T cells. Among these, we identified CD154 expressing cells. CD4+CD154+ T cells were then evaluated for IFN- $\gamma$ , TNF- $\alpha$  and IL-2 expression.
